# Supplementary material for: Symptomatic subsegmental versus more central pulmonary embolism: Clinical outcomes during anticoagulation
Source: PubMed Central journal article supplement — Res Pract Thromb Haemost. 2020 Nov 18;5(1):168–78. doi: 10.1002/rth2.12446 (PMC7845079; doi:10.1002/rth2.12446), 2020-11-18
Supplement: RTH2-5-168-s001.pdf [file RTH2-5-168-s001.pdf]

**List of IRB Committee name and Approval number for the Active Centers in RIETE Registry.**

| <b>IRB Committee name</b>                    | <b>City</b> | <b>Country</b> | <b>IRB Approval number</b> |
|----------------------------------------------|-------------|----------------|----------------------------|
| Hospital Germans Trias i Pujol               | Barcelona   | Spain          | <b>PI-17-053</b>           |
| Hospital de La Princesa                      | Madrid      | Spain          | <b>2211*</b>               |
| Hospital de la Axarquía                      | Málaga      | Spain          | <b>07/2016</b>             |
| Hospital General Univ. Gregorio Marañón      | Madrid      | Spain          | <b>04/2015</b>             |
| Hospital de Mataró                           | Barcelona   | Spain          | <b>12/2013</b>             |
| Hospital Monográfico ASEPEYO                 | Madrid      | Spain          | <b>2211*</b>               |
| Hospital Provincial Reina Sofía              | Córdoba     | Spain          | <b>04/2014</b>             |
| Hospital General Univ. de Alicante           | Alicante    | Spain          | <b>PI2013/20</b>           |
| Hospital Olot i Comarcal de la Garrotxa      | Girona      | Spain          | <b>03/2015</b>             |
| Hospital Virgen del Camino                   | Navarra     | Spain          | <b>2014-04-EO-B</b>        |
| Hospital Reina Sofía de Tudela               | Navarra     | Spain          | <b>11/2013</b>             |
| Hospital General Reina Sofía                 | Córdoba     | Spain          | <b>09/2013</b>             |
| Hospital Universitario de Salamanca          | Salamanca   | Spain          | <b>E.O. 19/598 NoEPA</b>   |
| Hospital de Girona Dr. Josep Trueta          | Girona      | Spain          | <b>11/2013</b>             |
| Hospital Universitario de Bellvitge- Idibell | Barcelona   | Spain          | <b>PR098/14</b>            |
| Hospital Municipal de Badalona               | Barcelona   | Spain          | <b>EO-06-036</b>           |
| Hospital Universitario La Paz                | Madrid      | Spain          | <b>PI-1528</b>             |
| Hospital Sierrallana                         | Cantabria   | Spain          | <b>2013.230</b>            |
| Hospital Universitario Puerto Real           | Cádiz       | Spain          | <b>14_50</b>               |

|                                                     |             |       |                   |
|-----------------------------------------------------|-------------|-------|-------------------|
| Clínica Universitaria de Navarra                    | Navarra     | Spain | <b>086/2013</b>   |
| Hospital del Espíritu Santo                         | Barcelona   | Spain | <b>01/2014</b>    |
| Hospital General Virgen de la Luz                   | Cuenca      | Spain | <b>07/2013</b>    |
| Hospital del Alto Guadalquivir<br>Andújar           | Jaén        | Spain | <b>05/2014</b>    |
| Hospital Univ. Puerta del Mar                       | Cádiz       | Spain | <b>11/2015</b>    |
| Hospital San Pedro de Alcántara                     | Cáceres     | Spain | <b>01/2014</b>    |
| Hospital Txagorritxu                                | Álava       | Spain | <b>PI2014123</b>  |
| Hospital Jerez de la Frontera                       | Cádiz       | Spain | <b>04/2018</b>    |
| Hospital Regional Universitario<br>de Málaga        | Málaga      | Spain | <b>01/2015</b>    |
| Hospital Ramón y Cajal                              | Madrid      | Spain | <b>02/2006</b>    |
| Hospital Asil de Granollers.                        | Barcelona   | Spain | <b>20143003</b>   |
| Hospital Virgen Macarena                            | Sevilla     | Spain | <b>2330</b>       |
| Hospital General Univ. de<br>Alicante               | Alicante    | Spain | <b>PI2013/20</b>  |
| Hospital San Pedro                                  | La Rioja    | Spain | <b>PI-128</b>     |
| Hospital Universitari i Politècnic<br>La Fe         | Valencia    | Spain | <b>2013/0410</b>  |
| Hospital de Tortosa Verge de la<br>Cinta            | Tarragona   | Spain | <b>09/2014</b>    |
| Hospital de Galdakao                                | Vizcaya     | Spain | <b>PI2014123</b>  |
| Complejo Hospitalario<br>Universitario de Cartagena | Murcia      | Spain | <b>12/2013</b>    |
| Hospital Clínico San Carlos                         | Madrid      | Spain | <b>14/169-E</b>   |
| Complejo Hospitalario de Ciudad<br>Real             | Ciudad Real | Spain | <b>10/2013</b>    |
| Complejo Hospitalario de Jaén                       | Jaén        | Spain | <b>10/2013</b>    |
| Hospital General Univ. de<br>Albacete               | Albacete    | Spain | <b>02/2017</b>    |
| ALTHAIA, Xarxa Assistencial de<br>Manresa           | Barcelona   | Spain | <b>CEIC 15/10</b> |

|                                                   |                            |       |                             |
|---------------------------------------------------|----------------------------|-------|-----------------------------|
| Hospital Universitario La Paz                     | Madrid                     | Spain | <b>PI-1528</b>              |
| Hospital El Vendrell                              | Tarragona                  | Spain | <b>09/2014</b>              |
| Hospital Univ. Joan XXIII de Tarragona            | Tarragona                  | Spain | <b>04/2014</b>              |
| Parc Sanitari Sant Joan de Déu - Hospital General | Barcelona                  | Spain | <b>08-001</b>               |
| Hospital Vall d'Hebrón                            | Barcelona                  | Spain | <b>PR(AG)194/2014</b>       |
| Hospital de Basurto                               | Vizcaya                    | Spain | <b>PI2014123</b>            |
| Hospital Universitario Virgen de la Arrixaca      | Murcia                     | Spain | <b>12/2013</b>              |
| Hospital Infanta Sofía                            | Madrid                     | Spain | <b>12/2013</b>              |
| Hospital Infanta Sofía                            | Madrid                     | Spain | <b>PI-1528</b>              |
| Hospital del Tajo                                 | Madrid                     | Spain | <b>13/264</b>               |
| Hospital Universitario de Vinalopó                | Alicante                   | Spain | <b>03/2014</b>              |
| Hospital Infanta Leonor                           | Madrid                     | Spain | <b>04/2016</b>              |
| Complejo Hospitalario de Pontevedra BIS           | Pontevedra                 | Spain | <b>2014/048</b>             |
| Hospital Universitario Miguel Servet              | Zaragoza                   | Spain | <b>11/2013</b>              |
| Consortio Hospitalario Provincial de Castellón    | Castellón                  | Spain | <b>04/2014</b>              |
| Hospital Sant Joan Despí-Moisés Broggi            | Barcelona                  | Spain | <b>14/07</b>                |
| Complejo Hospitalario Insular-Materno Infantil    | Gran Canaria               | Spain | <b>CEIC-CHUIMI-2015/804</b> |
| Hospital del Mar                                  | Barcelona                  | Spain | <b>2014/5738/I</b>          |
| Hospital de Can Misses                            | Ibiza                      | Spain | <b>10/2013</b>              |
| Hospital Rey Juan Carlos                          | Madrid                     | Spain | <b>06/2016</b>              |
| Hospital Universitario de Gran Canaria Dr. Negrín | Las Palmas de Gran Canaria | Spain | <b>130072</b>               |
| Hospital de Madrid Norte Sanchinarro              | Madrid                     | Spain | <b>13.06.480-GHM</b>        |
| Hospital Clínico Universitario de Santiago        | A Coruña                   | Spain | <b>2014/048</b>             |

|                                               |             |       |                      |
|-----------------------------------------------|-------------|-------|----------------------|
| Hospital Universitari Arnau de Vilanova       | Lleida      | Spain | <b>06/2014</b>       |
| Hospital del Mar                              | Barcelona   | Spain | <b>2015/6071/I</b>   |
| Hospital Virgen del Castillo                  | Murcia      | Spain | <b>06/2014</b>       |
| Hospital Universitario Doctor Peset           | Valencia    | Spain | <b>59/14</b>         |
| Hospital Universitario Marqués de Valdecilla  | Santander   | Spain | <b>2013.230</b>      |
| HCU Lozano Blesa                              | Zaragoza    | Spain | <b>PI14/0122</b>     |
| Hospital Clínico Universitario Lozano Blesa   | Zaragoza    | Spain | <b>PI14/0122</b>     |
| Hospital General Universitario de Albacete    | Albacete    | Spain | <b>03/2015</b>       |
| Hospital Universitario Clínic de Barcelona    | Barcelona   | Spain | <b>HCB/2015/0386</b> |
| Hospital Universitario 12 de Octubre          | Madrid      | Spain | <b>13/264</b>        |
| Hospital Comarcal de Alcañiz                  | Teruel      | Spain | <b>PI14/0122</b>     |
| Hospital Universitari i Politècnic La Fe      | Valencia    | Spain | <b>2013/0410</b>     |
| Pius Hospital de Valls                        | Tarragona   | Spain | <b>05/2015</b>       |
| Hospital Universitario Fundación Jiménez Díaz | Madrid      | Spain | <b>06/2016</b>       |
| Hospital Universitario Infanta Leonor         | Madrid      | Spain | <b>04/2016</b>       |
| Hospital San Pedro                            | La Rioja    | Spain | <b>PI-128</b>        |
| Hospital Universitario Clínic de Barcelona    | Barcelona   | Spain | <b>HCB/2015/0386</b> |
| Hospital Universitario de Valme               | Sevilla     | Spain | <b>0861-N-16</b>     |
| Hospital Universitario La Paz                 | Madrid      | Spain | <b>10/2016</b>       |
| Complejo Hospitalario Universitario de Ferrol | A Coruña    | Spain | <b>09/2016</b>       |
| Hospital Comarcal de Barbanza                 | A Coruña    | Spain | <b>2014/048</b>      |
| Hospital Santa Bárbara                        | Ciudad Real | Spain | <b>C-79</b>          |
| Hospital de Figueres                          | Gerona      | Spain | <b>10/2016</b>       |

|                                              |                     |           |                       |
|----------------------------------------------|---------------------|-----------|-----------------------|
| Hospital Clínico Universitario de Valladolid | Valladolid          | Spain     | <b>PI 16-471</b>      |
| Hospital General Universitario de Elda       | Alicante            | Spain     | <b>MI31001207</b>     |
| Hospital General Universitario de Albacete   | Albacete            | Spain     | <b>11/2016</b>        |
| Hospital Germans Trias i Pujol               | Badalona, Barcelona | Spain     | <b>PI-17-053</b>      |
| Hospital Universitario Doctor Peset          | Valencia            | Spain     | <b>59/14</b>          |
| Hospital Universitario Clínic de Barcelona   | Barcelona           | Spain     | <b>HCB/2015/0386</b>  |
| Hospital Universitario A Coruña              | A Coruña            | Spain     | <b>2014/048</b>       |
| Hospital Universitario Valle Hebrón          | Barcelona           | Spain     | <b>PR(AG)194/2014</b> |
| Hospital Universitari Sagrat Cor             | Barcelona           | Spain     | <b>2014/04</b>        |
| Hospital Universitario General de Cataluña   | Barcelona           | Spain     | <b>2014/04</b>        |
| Hospital Comarcal de L'Alt Penedés           | Barcelona           | Spain     | <b>PR098/14</b>       |
| Hospital Valle del Nalón                     | Asturias            | Spain     | <b>30/18</b>          |
| Hospital San Pedro                           | Logroño, La Rioja   | Spain     | <b>CEICLAR PI-128</b> |
| Hospital Universitario 12 de Octubre         | Madrid              | Spain     | <b>13/264</b>         |
| Complejo Hospitalario de Torrecárdenas       | Almeria             | Spain     | <b>49/2018</b>        |
| Hospital Universitario Clínic de Barcelona   | Barcelona           | Spain     | <b>HCB/2015/0386</b>  |
| Hospital Germans Trias i Pujol               | Barcelona           | Spain     | <b>PI-17-053</b>      |
| Hospital Clínico Universitario Lozano Blesa  | Zaragoza            | Spain     | <b>PI14/0122</b>      |
| Clínica Universidad de Navarra               | Madrid              | Spain     | <b>086/2013</b>       |
| Hospital de Poniente                         | Almeria             | Spain     | <b>19_29</b>          |
| Hospital Universitario Clínic de Barcelona   | Barcelona           | Spain     | <b>HCB/2015/0386</b>  |
| Hospital Germans Trias i Pujol               | Barcelona           | Spain     | <b>PI-17-053</b>      |
| Clínica San Camilo                           | Buenos Aires        | Argentina | <b>08/2016</b>        |

|                                                              |                   |                |                                                       |
|--------------------------------------------------------------|-------------------|----------------|-------------------------------------------------------|
| Hospital Italiano de Buenos Aires                            | Buenos Aires      | Argentina      | <b>3116</b>                                           |
| Clínica Privada Pueyrredón                                   | Mar de Plata      | Argentina      | <b>10/2019</b>                                        |
| UZ Gasthuisberg                                              | Leuven            | Belgium        | <b>B70721111790</b>                                   |
| Botucatu Medical School - São Paulo State University (UNESP) | São Paulo         | Brazil         | <b>CEP 18.618-970</b>                                 |
| Hospital Jorge Valente                                       | Salvador de Bahía | Brazil         | <b>CEP 41.810-011</b>                                 |
| Hospital/ Clínica La Merced                                  | Quito             | Ecuador        | <b>04/2015</b>                                        |
| Solón Espinosa Ayala, SOLCA Núcleo de Quito                  | Quito             | Ecuador        | <b>46/2019</b>                                        |
| Peking University Cancer Hospital and Institute              | Pekin             | China          | <b>03/2018</b>                                        |
| University Hospital Fakultiní Nemocnice                      | Hradec Králové    | Czech Republic | <b>201312SO5P (11/2013)</b>                           |
| University Hospital Plzen                                    | Plzen             | Czech Republic | <b>400/2013 (10/2013)</b>                             |
| Hôpital Nord - CHU St-Etienne                                | Saint-Etienne     | France         | <b>CE-CIC/GREN/07/01 (IRB: 00005921-IRB:00005891)</b> |
| Hôpital Nord - CHU St-Etienne                                | Saint-Etienne     | France         | <b>CE-CIC/GREN/07/01 (IRB: 00005921-IRB:00005891)</b> |
| Centre Hospitalier Universitaire Hôpital de Dijon            | Dijon             | France         | <b>CE-CIC/GREN/07/01 (IRB: 00005921-IRB:00005891)</b> |
| Hôpital de Rangueil                                          | Toulouse          | France         | <b>CE-CIC/GREN/07/01 (IRB: 00005921-IRB:00005891)</b> |
| CHU Montpellier St Eloi                                      | Montpellier       | France         | <b>CE-CIC/GREN/07/01 (IRB: 00005921-IRB:00005891)</b> |
| Hôpital Louis Mourier                                        | Colombes          | France         | <b>CE-CIC/GREN/07/01 (IRB: 00005921-IRB:00005891)</b> |
| Hôpital Saint-Louis                                          | Paris             | France         | <b>CE-CIC/GREN/07/01 (IRB: 00005921-IRB:00005891)</b> |
| Clermont-Ferrand University Hospital                         | Clermont-Ferrand  | France         | <b>CE-CIC/GREN/07/01 (IRB: 00005921-IRB:00005891)</b> |
| Institut Sainte Catherine                                    | Avignon           | France         | <b>CE-CIC/GREN/07/01 (IRB: 00005921-IRB:00005891)</b> |
| Hôpital Cochin                                               | Paris             | France         | <b>CE-CIC/GREN/07/01 (IRB: 00005921-IRB:00005891)</b> |
| Hospital Center of Avignon                                   | Avignon           | France         | <b>CE-CIC/GREN/07/01 (IRB: 00005921-IRB:00005891)</b> |

|                                                 |                     |          |                                                                |
|-------------------------------------------------|---------------------|----------|----------------------------------------------------------------|
| Hôpital de la Timone                            | Marseille           | France   | <b>CE-CIC/GREN/07/01<br/>(IRB: 00005921-<br/>IRB:00005891)</b> |
| CHU Nantes                                      | Nantes              | France   | <b>CE-CIC/GREN/07/01<br/>(IRB: 00005921-<br/>IRB:00005891)</b> |
| Municipal Hospital of Dresden<br>Friedrichstadt | Dresden             | Germany  | <b>11/2017</b>                                                 |
| Hospital Papageorgion                           | Saloniki            | Greece   | <b>02/2014</b>                                                 |
| Hospital Escuela Universitario                  | Tegucigalpa         | Honduras | <b>05/2016</b>                                                 |
| Rambam Healthcare Campus                        | Haifa               | Israel   | <b>0146-12-RMB (06/2013)</b>                                   |
| Western Galilee Hospital                        | Mehoz HaZafon       | Israel   | <b>06/2013</b>                                                 |
| Abu-Ali- Sina Organ Transplant<br>Center (OCT)  | Sadra               | Iran     | <b>1.398.778</b>                                               |
| Ospedale Buonconsiglio<br>Fatebenefratelli      | Naples              | Italy    | <b>03/2006</b>                                                 |
| Second University of Naples                     | Naples              | Italy    | <b>03/2006</b>                                                 |
| University of Padua                             | Padua               | Italy    | <b>09/2013</b>                                                 |
| Ospedale Galliera                               | Genova              | Italy    | <b>12/2013</b>                                                 |
| Ospedale Infermi                                | Rimini              | Italy    | <b>01/2014</b>                                                 |
| Azienda Ospedaliera<br>Universitaria            | Parma               | Italy    | <b>17/2014/OSS/AOUPR</b>                                       |
| Casa Sollievo Della Sofferenza                  | Foggia              | Italy    | <b>01/2015</b>                                                 |
| AORN San Giuseppe Moscati<br>Avellino           | Avellino            | Italy    | <b>01/2014</b>                                                 |
| Ospedale Castelfranco TV                        | Castelfranco Veneto | Italy    | <b>09/2013</b>                                                 |
| Instituto Clinico Humanitas<br>IRCCS            | Milan               | Italy    | <b>07/2014</b>                                                 |
| Centro Studi FADOI                              | Milán               | Italy    | <b>03/2006</b>                                                 |
| Azienda U.S.L. Di Ravenna -<br>O.C. Di Faenza   | Ravenna             | Italy    | <b>01/2014</b>                                                 |
| Ospedale San Camillo                            | Rome                | Italy    | <b>08/2014</b>                                                 |
| Ospedale SS. Filippo e Nicola                   | L'Aquila            | Italy    | <b>13CE/15</b>                                                 |

|                                                               |                      |                       |                     |
|---------------------------------------------------------------|----------------------|-----------------------|---------------------|
| Hospital Villa Sofia                                          | Sicily               | Italy                 | <b>01/2014</b>      |
| Ospedale SS. Giovanni e Paolo di Venezia                      | Venice               | Italy                 | <b>04/2015</b>      |
| "A. Gemelli " Hospital                                        | Rome                 | Italy                 | <b>8577/15</b>      |
| A.O.U Policlinico "G. Martino"                                | Messin               | Italy                 | <b>81/17</b>        |
| Istituti Ospitalieri di Cremona                               | Cremona              | Italy                 | <b>22683</b>        |
| Hospital Rieti                                                | Rieti                | Italy                 | <b>589</b>          |
| Pauls Stradins Clinical University Hospital                   | Riga                 | Latvia                | <b>06/2014</b>      |
| Faculty of Medicine, Clinical Center                          | Skopje               | Republic of Macedonia | <b>03-676/2</b>     |
| Asthma Center                                                 | Skopje               | Republic of Macedonia | <b>08/2011</b>      |
| Centro Hospitalar de Entre o Douro e Vouga                    | Santa Maria da Feira | Portugal              | <b>05/2019</b>      |
| Centro Hospitalar Gaia/Espinho, EPE                           | Vila Nova de Gaia    | Portugal              | <b>02/2012</b>      |
| Hospital Garcia de Orta,                                      | Almada, Portugal     | Portugal              | <b>07/2016</b>      |
| Hospital Pedro Hispano - Unidade Local de Saude de Matosinhos | Matosinhos           | Portugal              | <b>89/CE/JAS</b>    |
| University Hospital of Geneva                                 | Geneva               | Switzerland           | <b>02/2010</b>      |
| Centre Hospitalier Universitaire Vaudois (CHUV)               | Lausanne             | Switzerland           | <b>12/2010</b>      |
| Evanston Hospital                                             | Illinois             | USA                   | <b>07/2013</b>      |
| Yale University School of Medicine                            | New Haven            | USA                   | <b>FWA00002571</b>  |
| Yale University School of Medicine                            | New Haven            | USA                   | <b>FWA00002571</b>  |
| Massachusetts General Hospital                                | Boston               | USA                   | <b>2019P000280</b>  |
| Hanoi Medical University Hospital                             | Hanoi                | Vietnam               | <b>IRB 00003121</b> |
| Bach Mai Hospital Vietnam Heart Institute                     | Hanoi                | Vietnam               | <b>04/2017</b>      |
| Viet Duc Hospital                                             | Hanoi                | Vietnam               | <b>06/2017</b>      |
| Cho Ray Hospital                                              | Ho Chi Minh          | Vietnam               | <b>10/2017</b>      |
